# Supplementary material for: Characterization and molecular docking of new Δ17 fatty acid desaturase genes from Rhizophagus irregularis and Octopus bimaculoides
Source: Royal Society of Chemistry journal article supplement (doi:10.1039/c9ra00535h), 2019-01-01
Supplement: c9ra00535h1.pdf [file c9ra00535h1.pdf]

## 1. Supplementary Figures

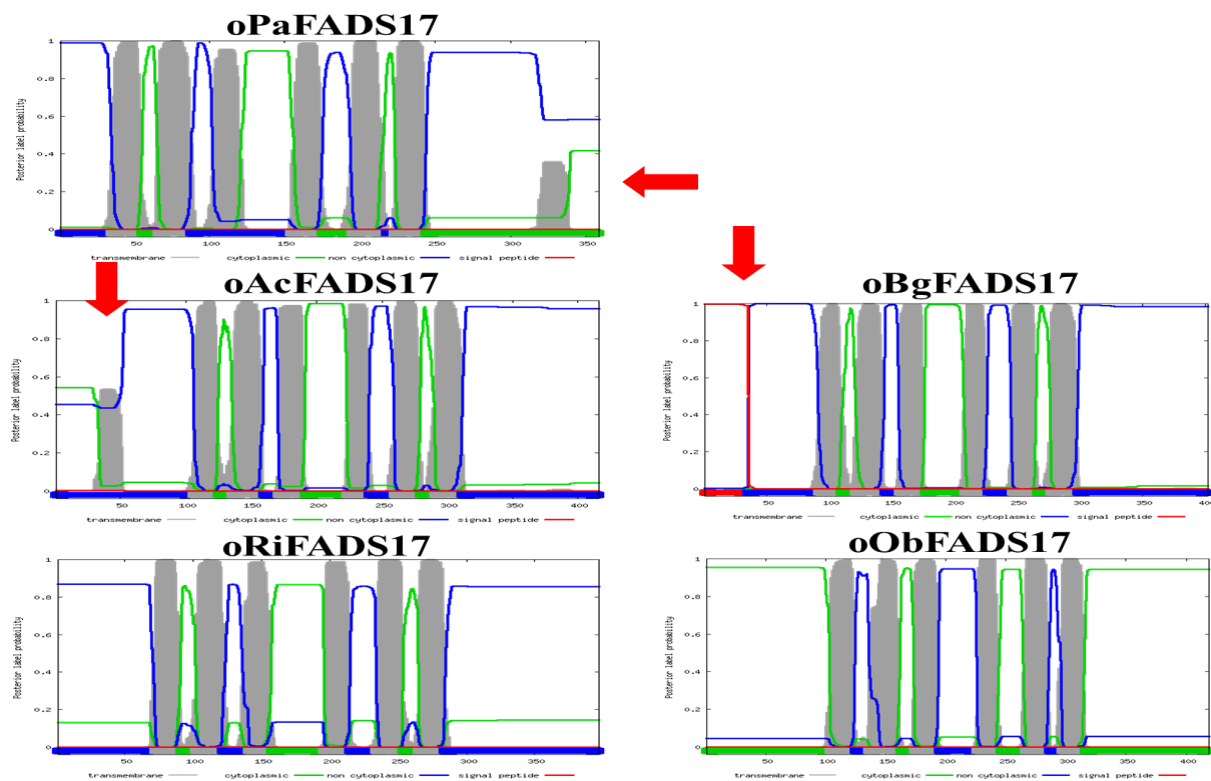

**Fig. S1:** Posterior probabilities for these oPaFADS17, oAcFADS17, oBgFADS17, oObFADS17 and oRiFADS17 proteins. Phobius, HMMTOP, and TMHMM online websites were used to perform bioinformatics analyses.

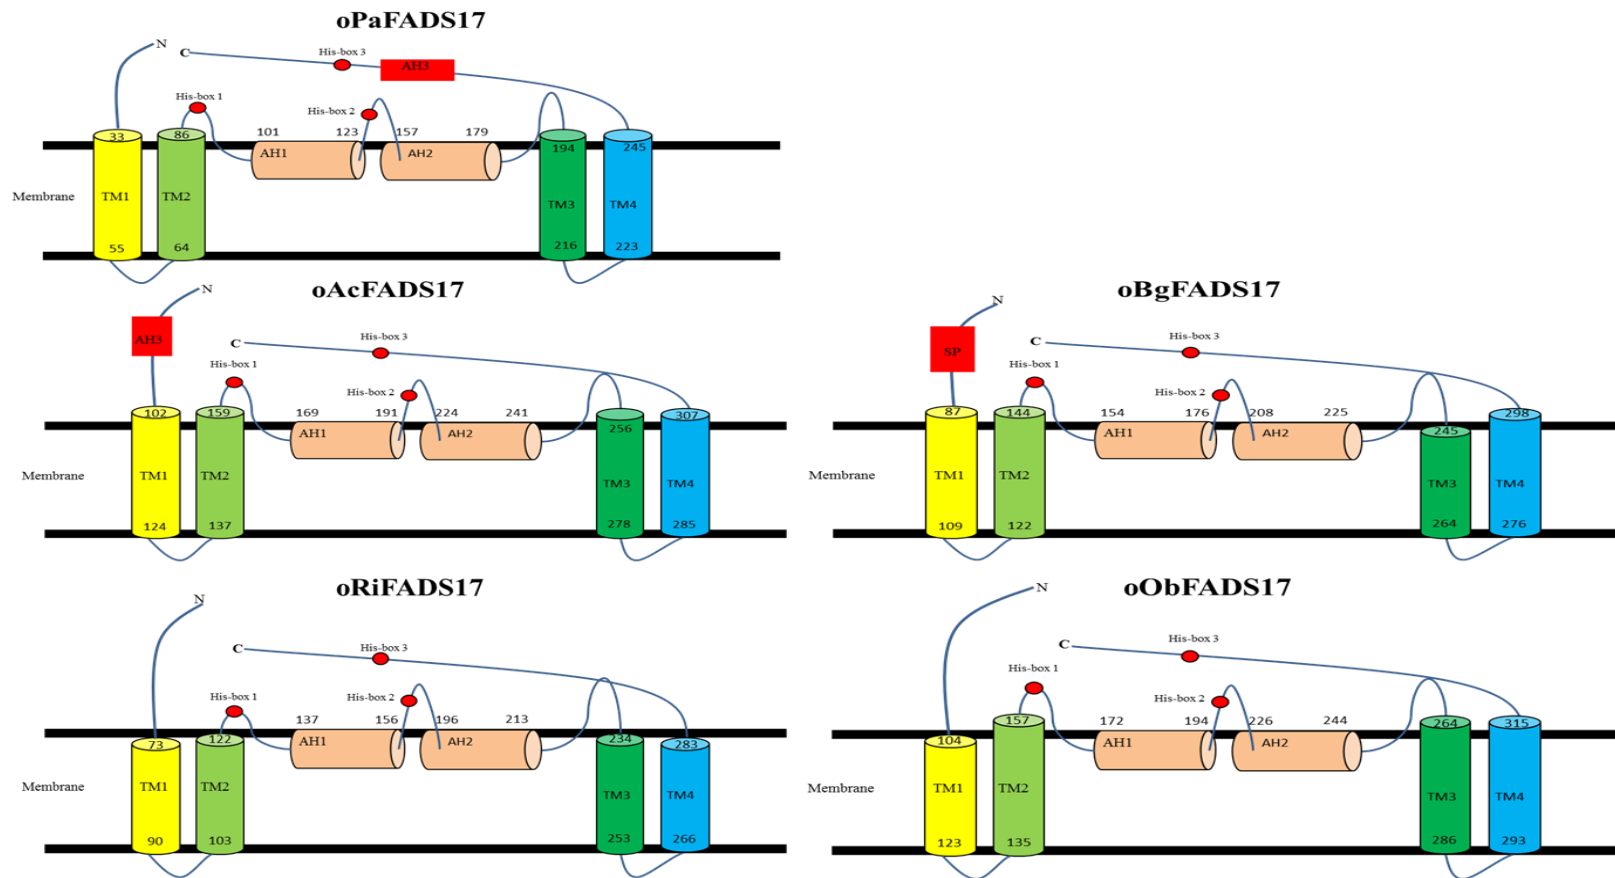

**Fig. S2:** Proposed topology model of these oPaFADS17, oAcFADS17, oBgFADS17, oObFADS17 and oRiFADS17 proteins. TM1~4 and AH1~2 were 6 transmembrane helix domains and the internal numbers indicated their probable locations. Pellets labeled in red denoted the three conserved histidine-rich motifs in the deduced primary amino acid sequences.
